# Supplementary material
Source: publisher figshare collection journal article supplement (https://acs.figshare.com/ndownloader/files/3776155)
Supplement: Supplementary file 1 [file 3776155]

## Supporting Information

### **Development of New Photovoltaic Conjugated Polymers Based on Di(1-benzothieno)[3,2-b:2',3'-d]pyrrole: Benzene Ring Extension Strategy for Improving Open-Circuit Voltage**

In Hwan Jung<sup>†</sup>, Ji-Hoon Kim<sup>‡</sup>, So Youn Nam<sup>†</sup>, Changjin Lee<sup>†</sup>, Do-Hoon Hwang<sup>\*,‡</sup>, Sung Cheol Yoon<sup>\*,†</sup>

<sup>†</sup> *Advanced Materials Division, Korea Research Institute of Chemical Technology (KRICT),  
Daejeon 305-600, Republic of Korea*

<sup>‡</sup> *Department of Chemistry, and Chemistry Institute for Functional Materials, Pusan National  
University, Busan 609-735, Republic of Korea*

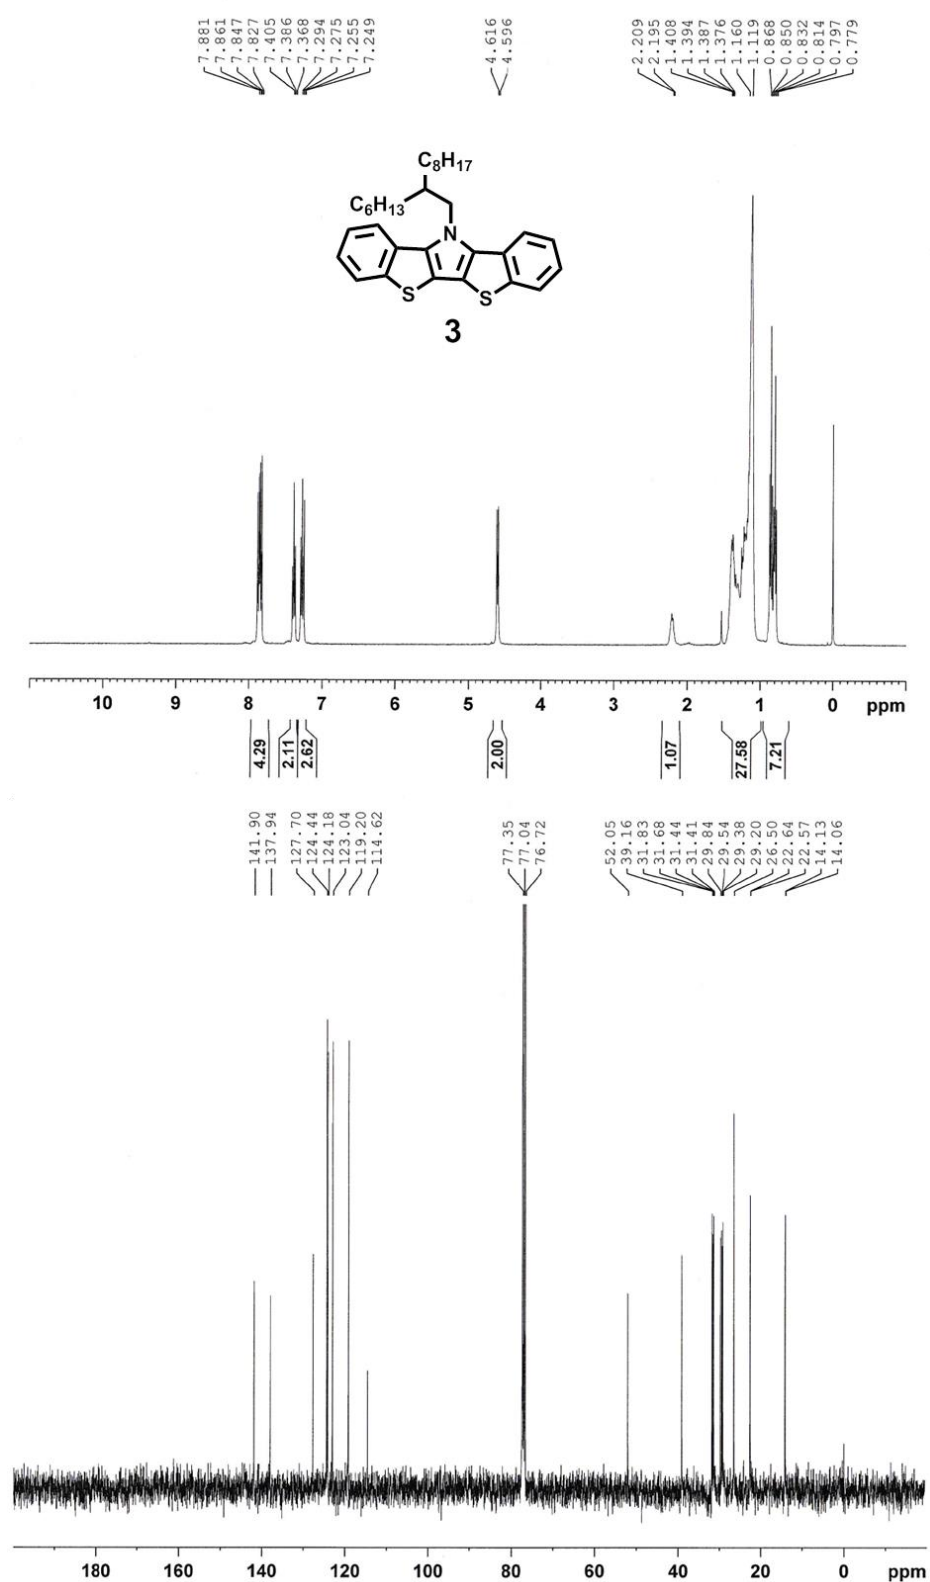

**Figure S1.** <sup>1</sup>H and <sup>13</sup>C NMR spectra of 11-(2-Hexyldecyl)-11H-benzo[4,5]thieno[3,2-b]benzo[4,5]thieno[2,3-d]pyrrole (3)

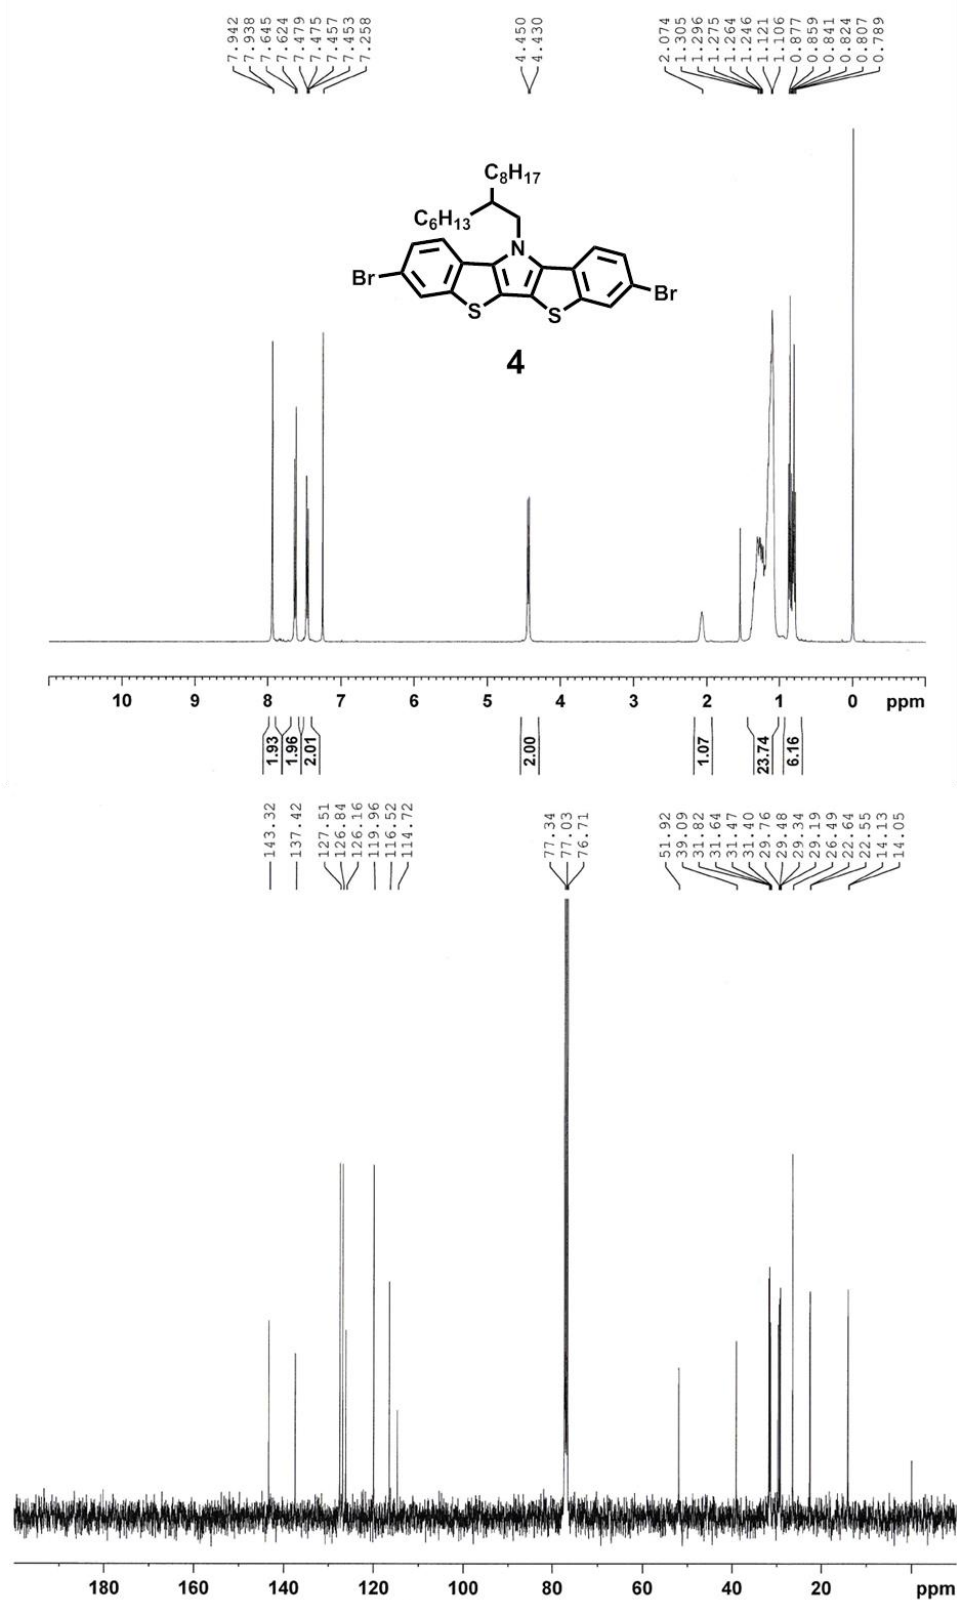

**Figure S2.** <sup>1</sup>H and <sup>13</sup>C NMR spectra of 3,8-Dibromo-11-(2-hexyldecyl)-11H-benzo[4,5]thieno[3,2-b]benzo[4,5]thieno[2,3-d]pyrrole (**4**)

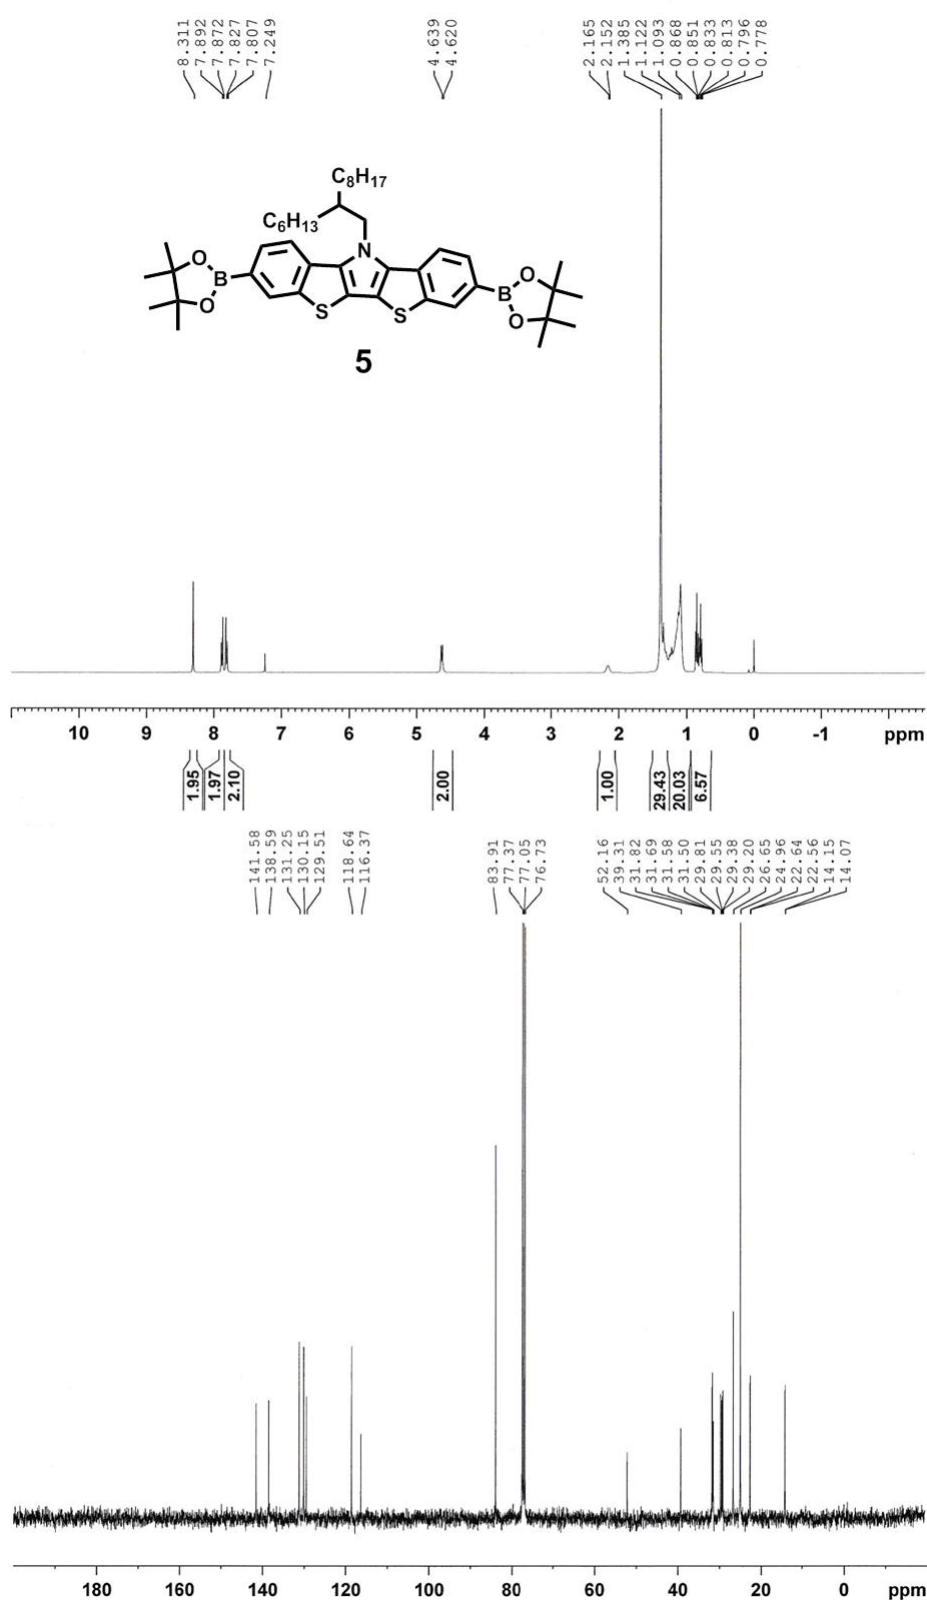

**Figure S3.** <sup>1</sup>H and <sup>13</sup>C NMR spectra of 11-(2-hexyldecyl)-3,8-bis(4,4,5,5-tetramethyl-1,3,2-dioxaborolan-2-yl)-11H-benzo[4,5]thieno[3,2-b]benzo[4,5]thieno[2,3-d]pyrrole (**5**)

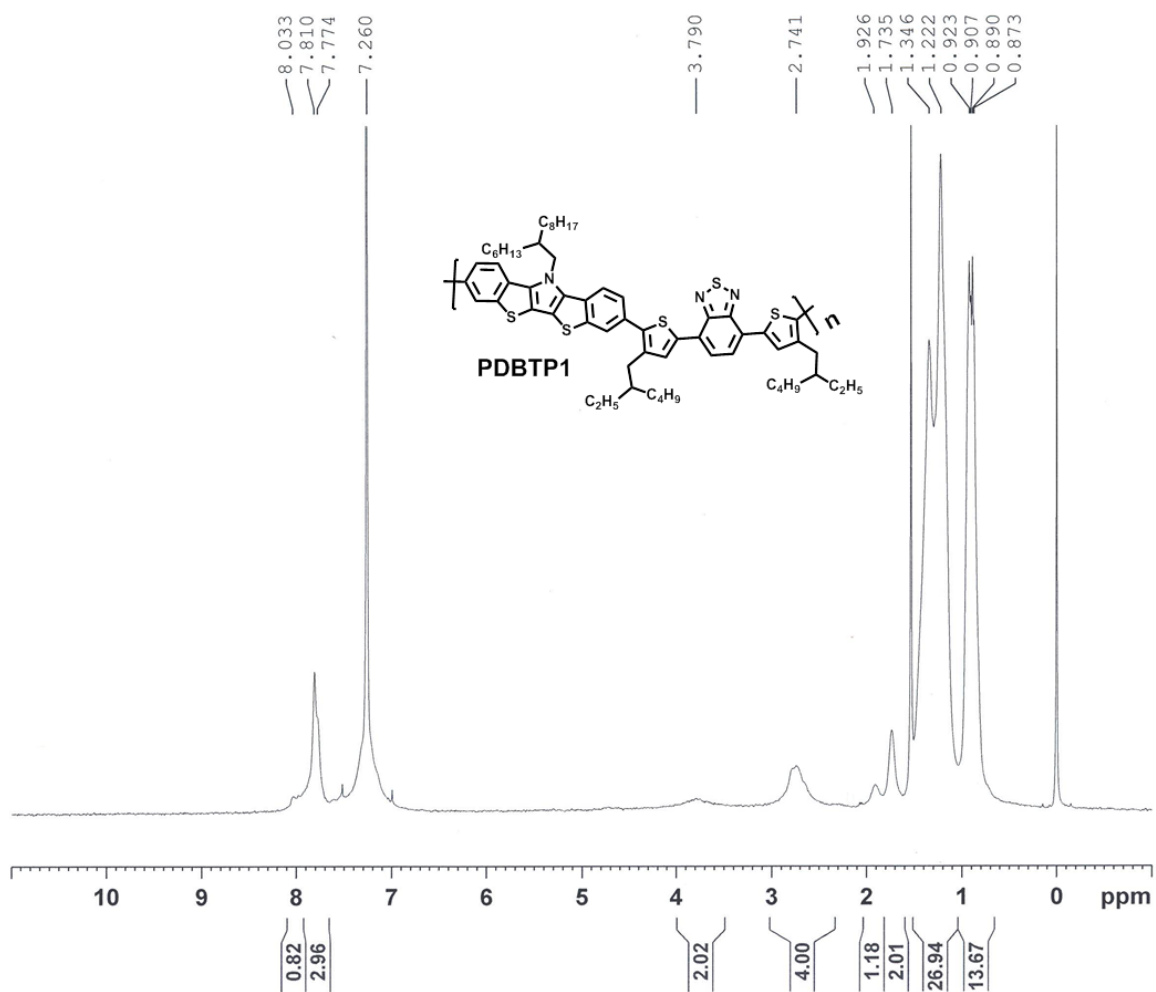

**Figure S4.**  $^1\text{H}$  NMR spectrum of **PDBTP1**

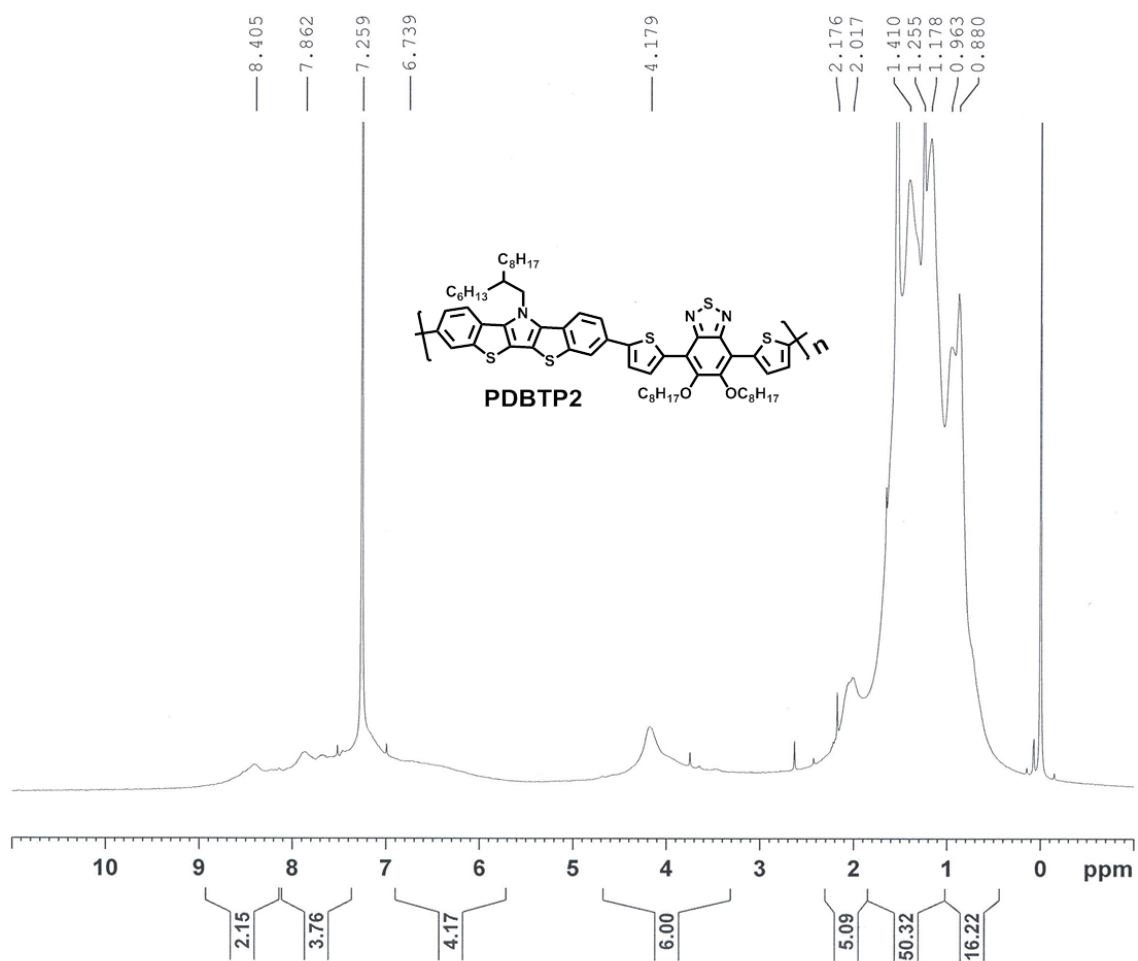

**Figure S5.**  $^1\text{H}$  NMR spectrum of **PDBTP2**



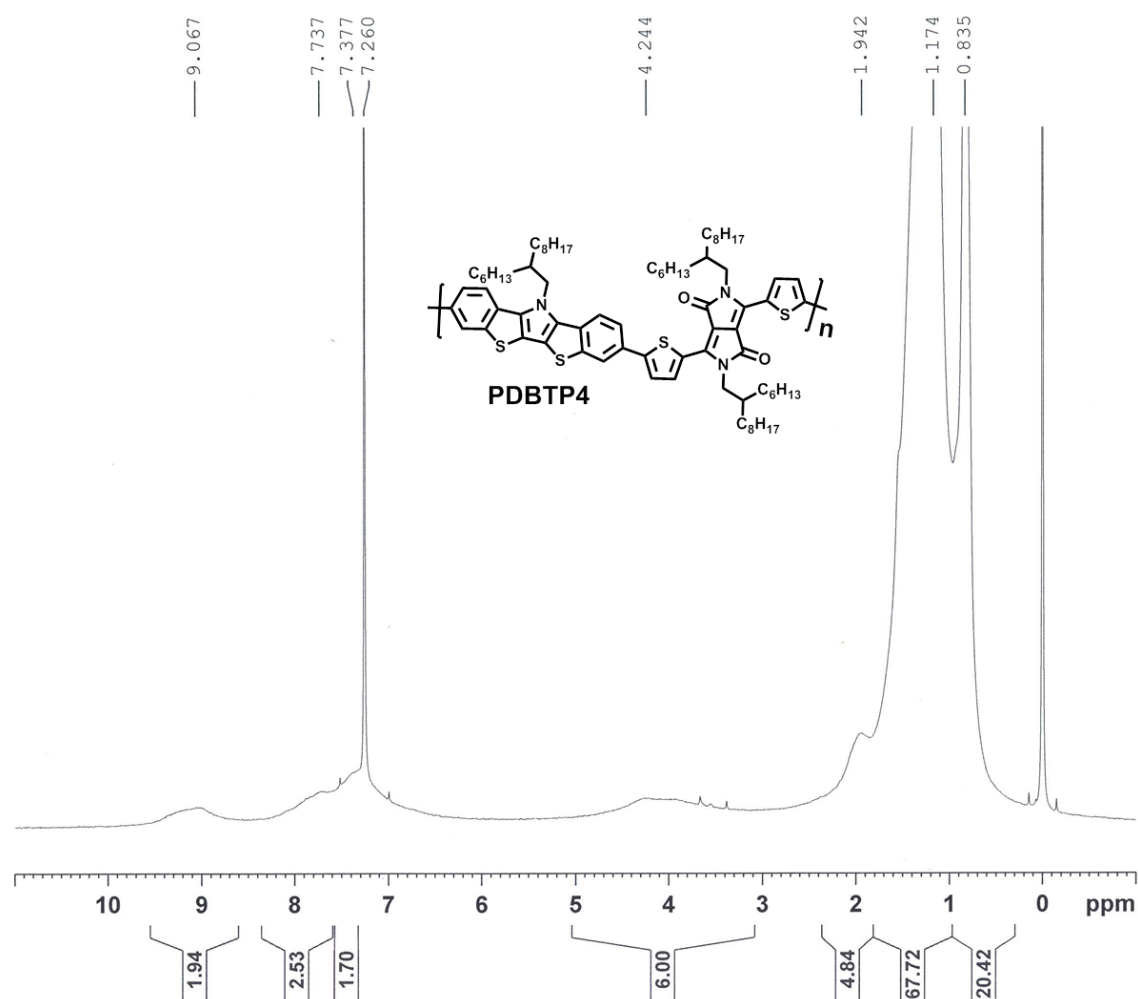

**Figure S7.**  $^1\text{H}$  NMR spectrum of **PDBTP4**



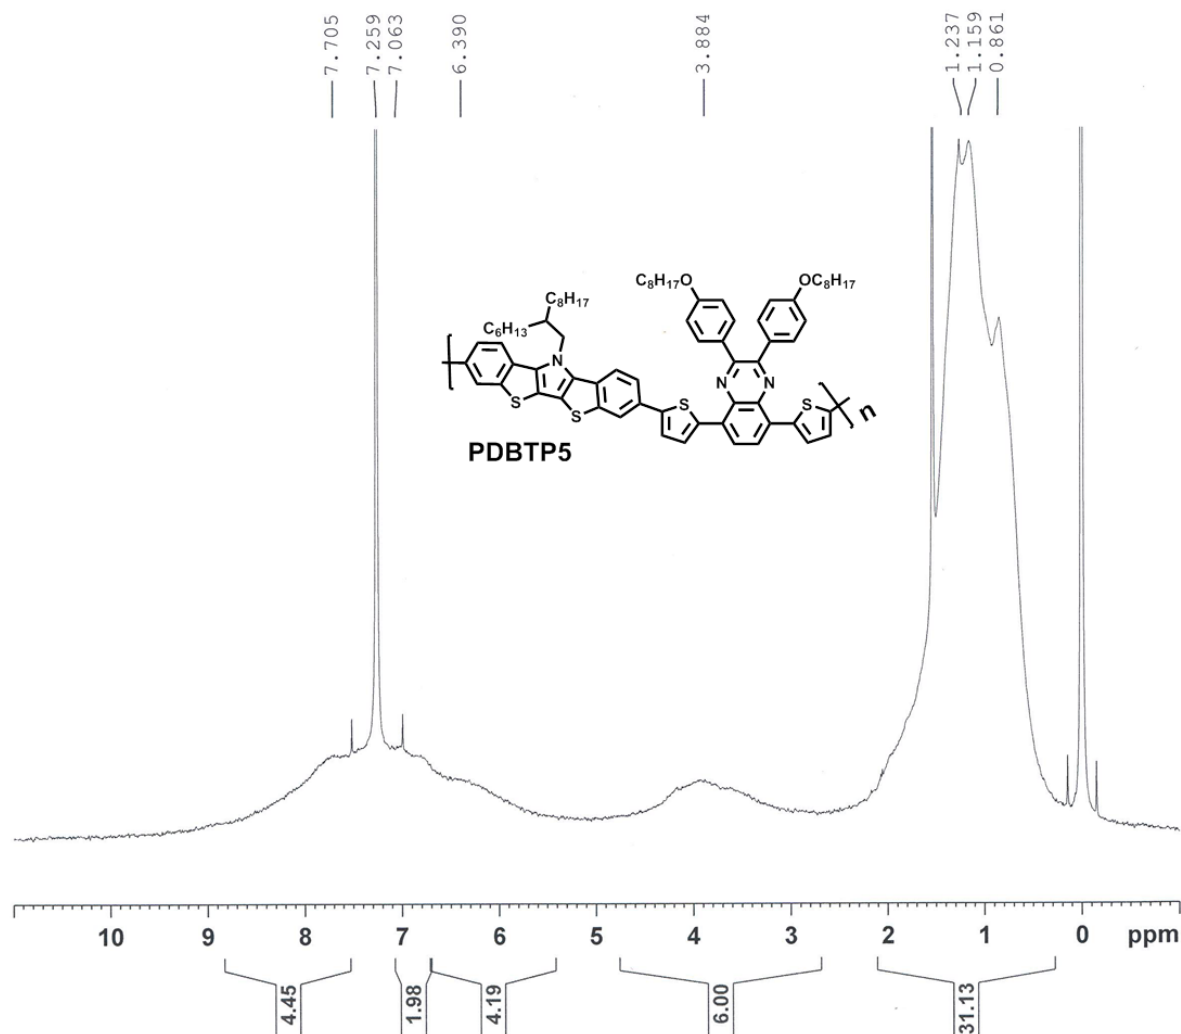

**Figure S8.**  $^1\text{H}$  NMR spectrum of **PDBTP5**

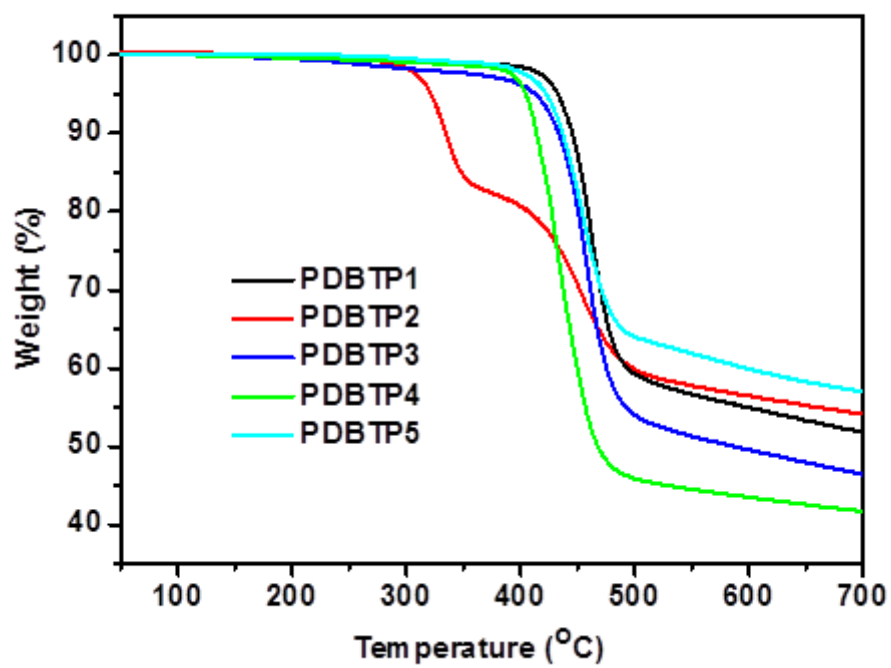

**Figure S9.** TGA thermograms of the polymers

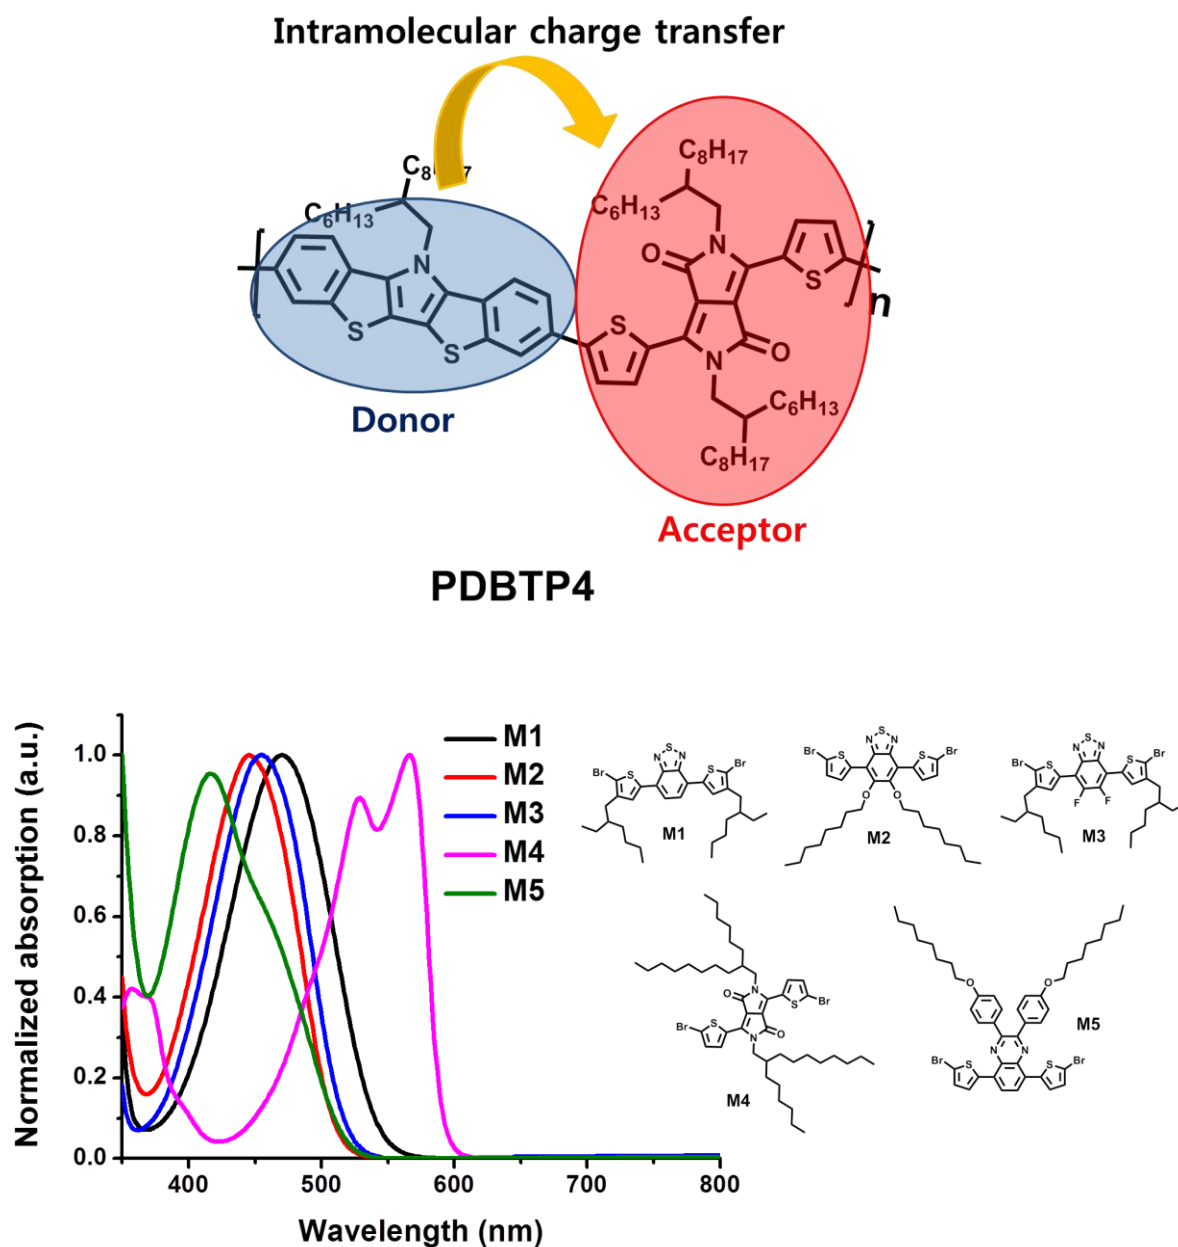

**Figure S10.** Absorption spectra of electron accepting monomers (M1 ~ M5)

## Theoretical Calculation

The ground-state ( $S_0$ ) geometric structure and the frontier orbitals of the two repeating units of the synthesized alternating co-polymers were calculated with density functional theory (DFT) using the B3LYP functional and a 6-31G(d) basis set. The  $S_0$  geometries were derived via spin-restricted calculations while the radical ionic structures were obtained via spin-unrestricted calculations; adiabatic ionization potentials (IPs) and electron affinities (EAs) were computed via  $\Delta$ SCF method. All the calculations were carried out using the Gaussian 09 program package.

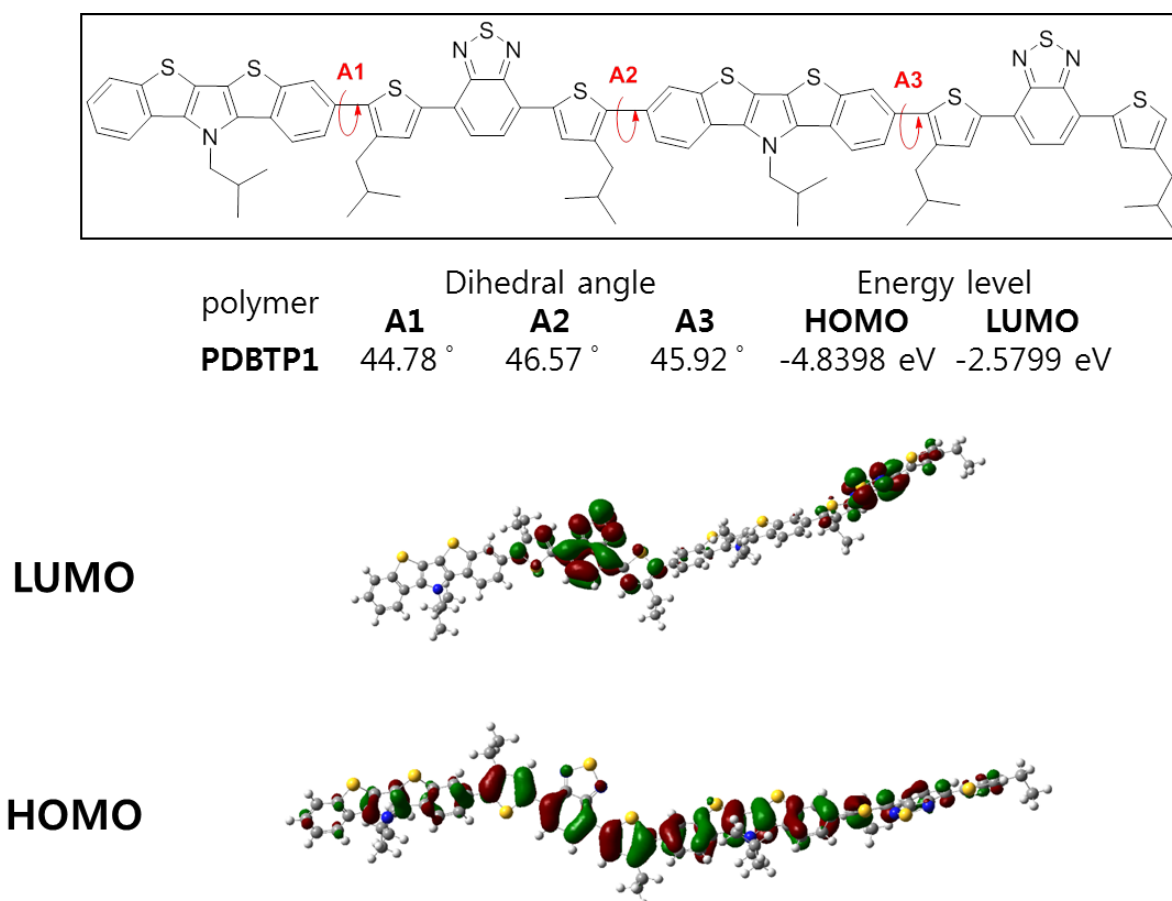

**Figure S11.** The ground-state ( $S_0$ ) geometric structure, and HOMO and LUMO orbitals of **PDBTP1**, calculated by DFT method using B3LYP/6-31G(d).

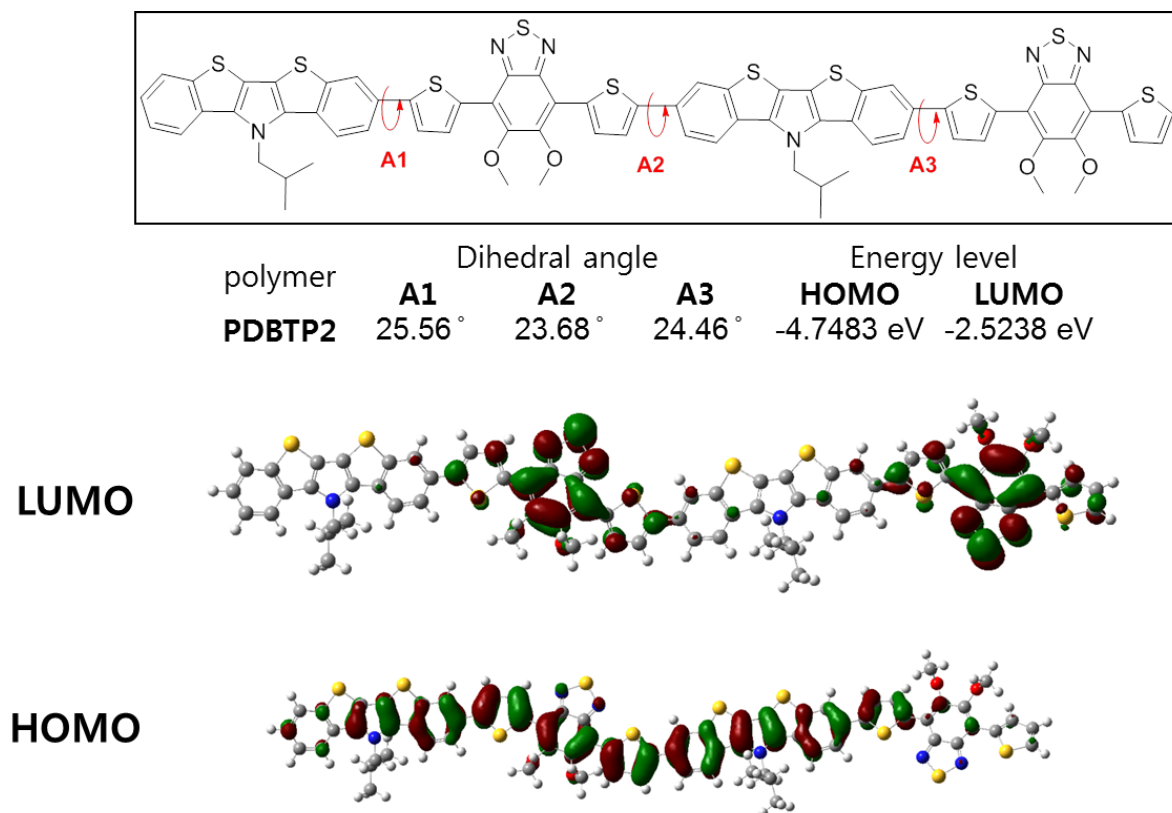

**Figure S12.** The ground-state (S0) geometric structure, and HOMO and LUMO orbitals of **PDBTP2**, calculated by DFT method using B3LYP/6-31G(d).

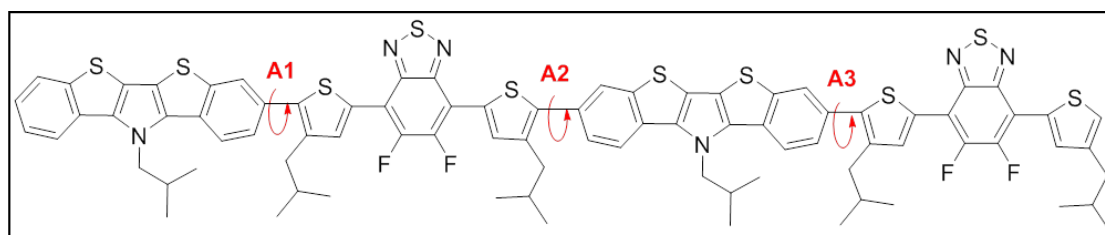

| polymer | Dihedral angle |         |         | Energy level |            |
|---------|----------------|---------|---------|--------------|------------|
| PDBTP3  | A1             | A2      | A3      | HOMO         | LUMO       |
|         | 44.83 °        | 45.91 ° | 45.05 ° | -4.9347 eV   | -2.7045 eV |

LUMO

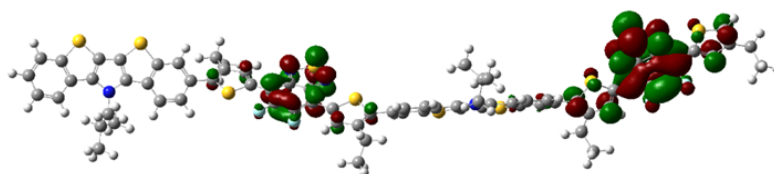

HOMO

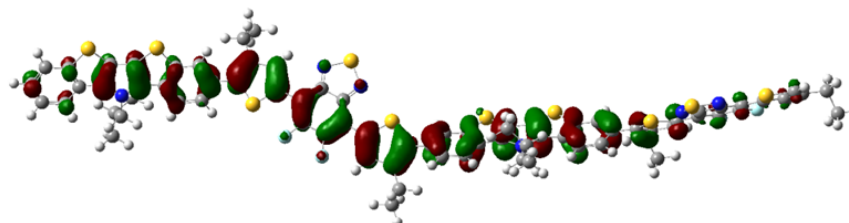

**Figure S13.** The ground-state (S0) geometric structure, and HOMO and LUMO orbitals of **PDBTP3**, calculated by DFT method using B3LYP/6-31G(d).

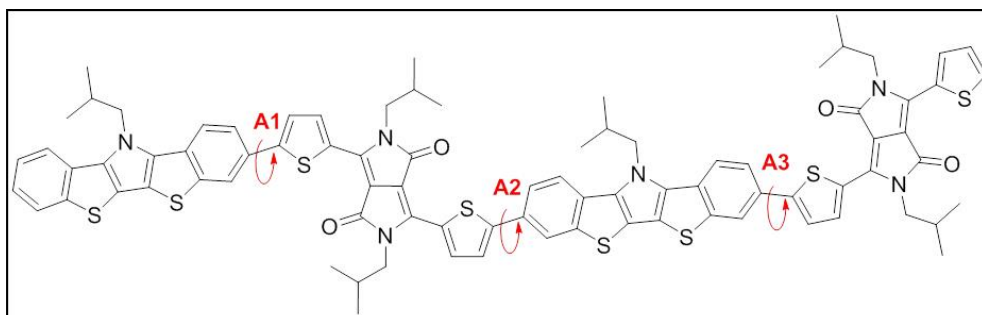

| polymer       | Dihedral angle |           |           | Energy level |             |
|---------------|----------------|-----------|-----------|--------------|-------------|
|               | <b>A1</b>      | <b>A2</b> | <b>A3</b> | <b>HOMO</b>  | <b>LUMO</b> |
| <b>PDBTP4</b> | 25.89 °        | 23.10 °   | 21.10 °   | -4.7157 eV   | -2.5796 eV  |

**LUMO**

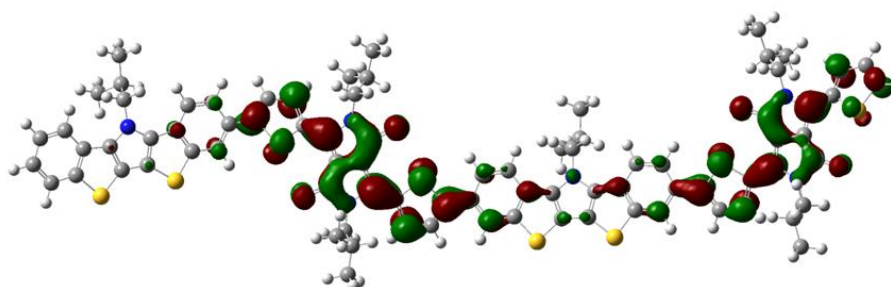

**HOMO**

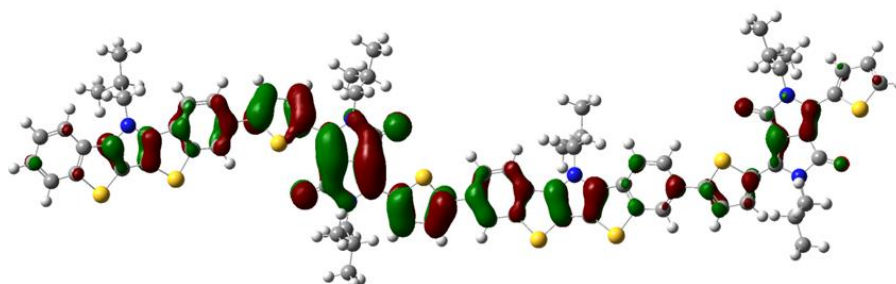

**Figure S14.** The ground-state (S0) geometric structure, and HOMO and LUMO orbitals of **PDBTP4**, calculated by DFT method using B3LYP/6-31G(d).

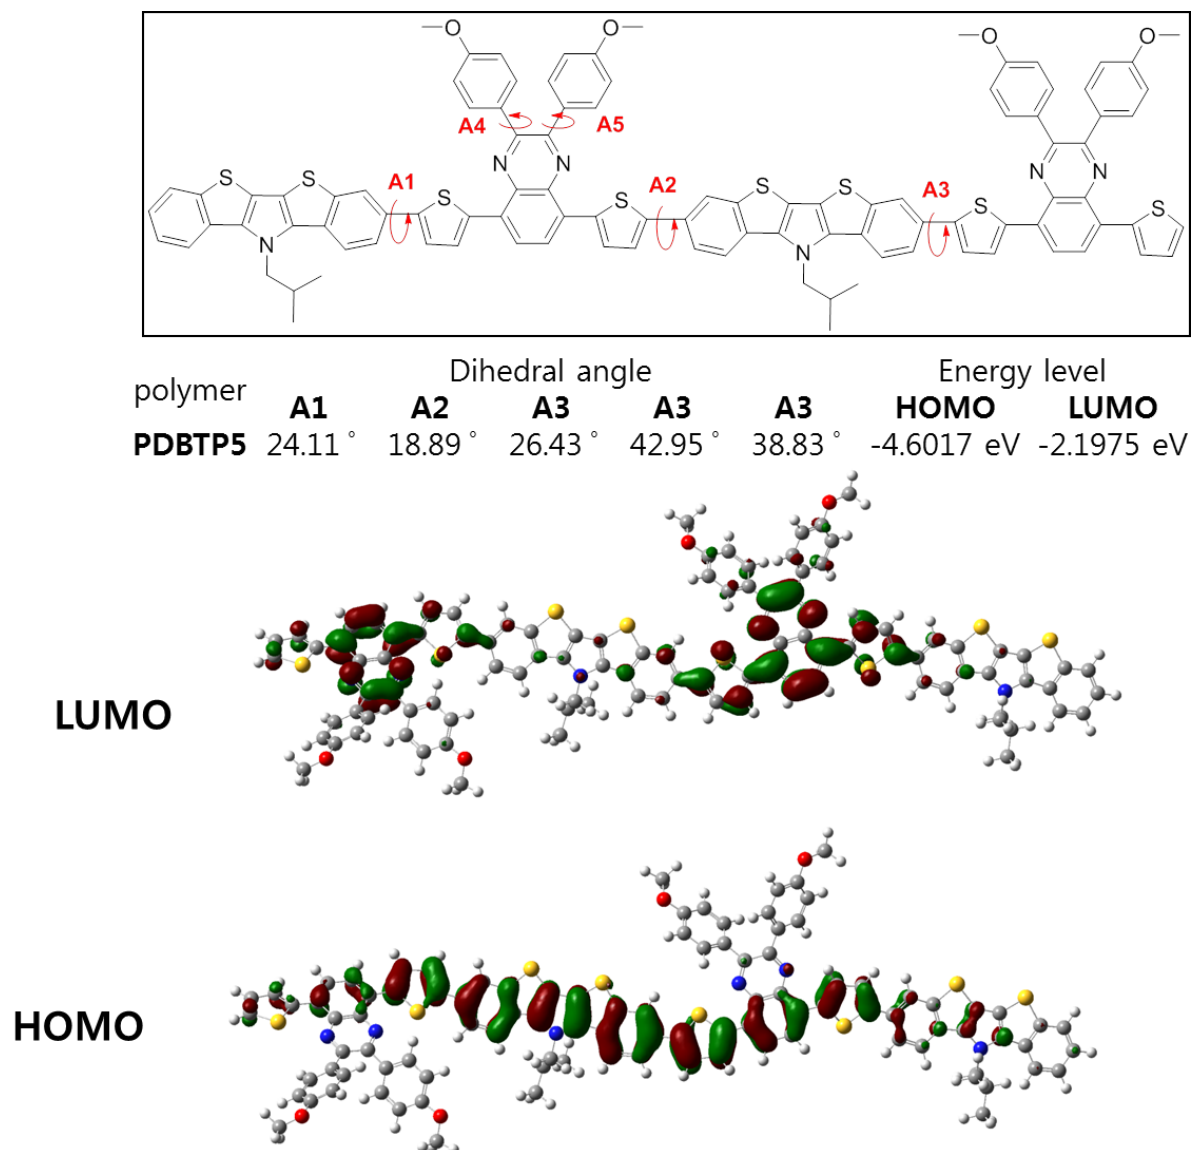

**Figure S15.** The ground-state (S0) geometric structure, and HOMO and LUMO orbitals of **PDBTP5**, calculated by DFT method using B3LYP/6-31G(d).



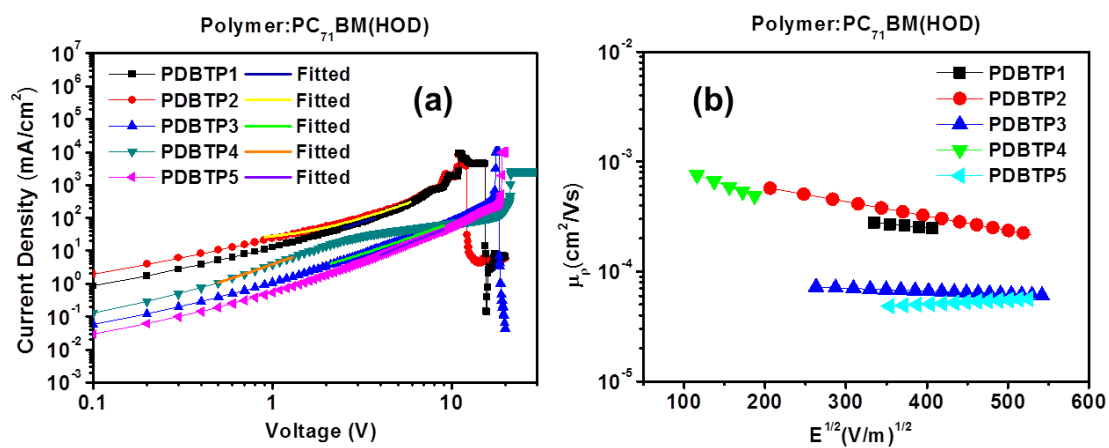

**Figure S16.** (a)  $J$ – $V$  characteristics of the hole-only devices and (b) field-dependent hole mobilities of polymer:PC<sub>71</sub>BM films calculated by fitting the  $J$ – $V$  curves in the SCLC regime.

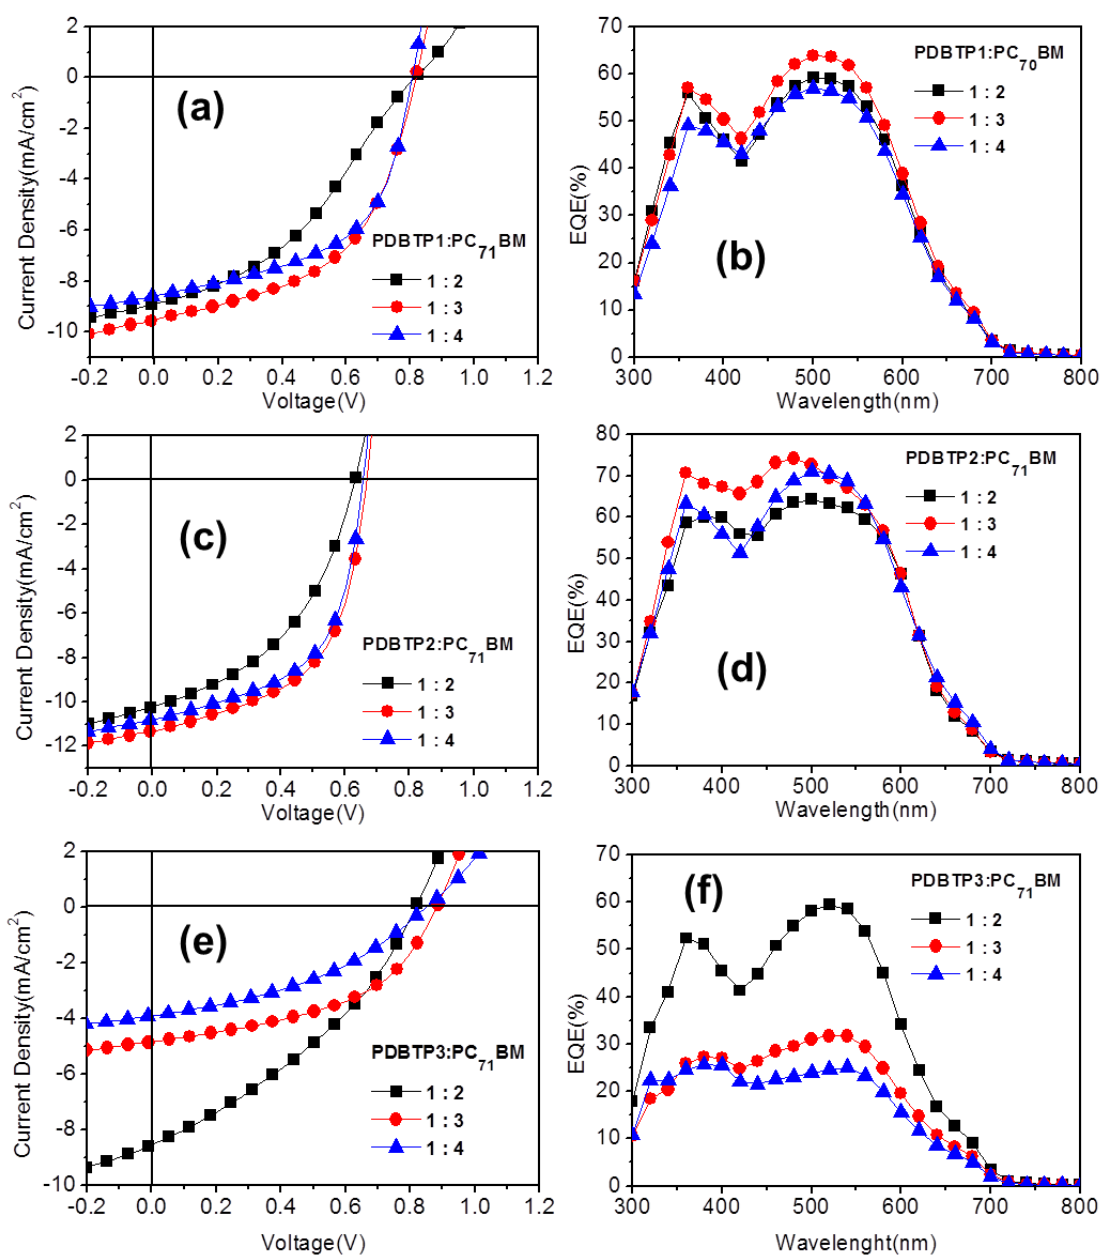

**Figure S17.**  $J-V$  characteristics, under simulated AM 1.5 G solar irradiation, of (a) **PDBTP1:PC<sub>71</sub>BM**, (c) **PDBTP2:PC<sub>71</sub>BM**, and (e) **PDBTP3:PC<sub>71</sub>BM** blend films with different blend ratios. EQE spectra of (b) **PDBTP1:PC<sub>71</sub>BM**, (d) **PDBTP2:PC<sub>71</sub>BM**, and (f) **PDBTP3:PC<sub>71</sub>BM** blends.

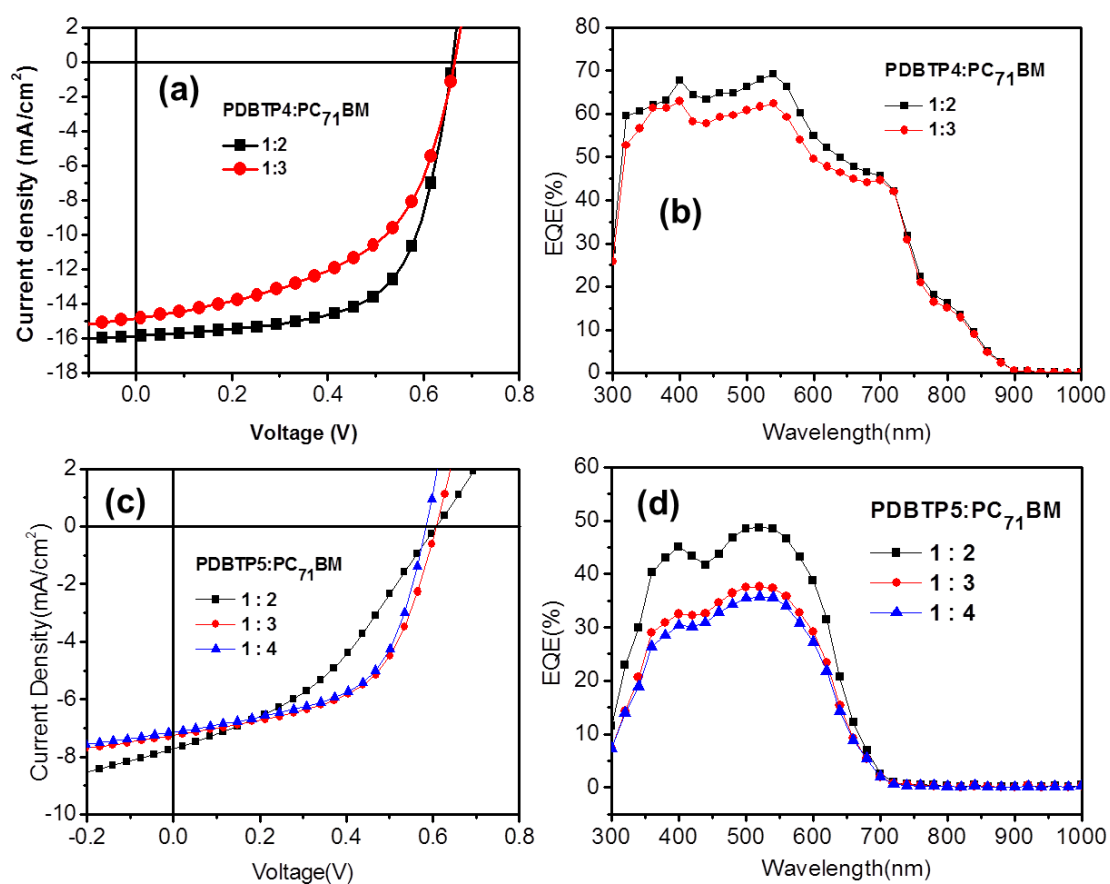

**Figure S18** .  $J-V$  characteristics, under simulated AM 1.5 G solar irradiation, of (a) **PDBTP4:PC<sub>71</sub>BM** and (c) **PDBTP5:PC<sub>71</sub>BM** blend films with different blend ratios. EQE spectra of (b) **PDBTP4:PC<sub>71</sub>BM** and (d) **PDBTP5:PC<sub>71</sub>BM** blends.
